# Supplementary material for: Full-range birefringence control with piezoelectric MEMS-based metasurfaces
Source: PubMed Central journal article supplement (PMC9018774; doi:10.1038/s41467-022-29798-0), 2022-04-19
Supplement: 41467_2022_29798_MOESM1_ESM.pdf [file 41467_2022_29798_MOESM1_ESM.pdf]

## Supplementary Information

### Full-range birefringence control with piezoelectric MEMS-based metasurfaces

Chao Meng,<sup>1†</sup> Paul C. V. Thrane,<sup>1,2†</sup> Fei Ding,<sup>1\*</sup> and Sergey I. Bozhevolnyi<sup>1\*</sup>

<sup>1</sup>*Centre for Nano Optics, University of Southern Denmark, Campusvej 55, Odense DK-5230, Denmark*

<sup>2</sup>*SINTEF Microsystems and Nanotechnology, Gaustadalleen 23C, 0737 Oslo, Norway*

<sup>†</sup>These authors contributed equally to this work

\*Corresponding author emails: feid@mci.sdu.dk (F.D.); seib@mci.sdu.dk (S.I.B.)

#### The PDF file includes:

Supplementary Table 1

S1. Optimization of the nanobrick dimensions

S2. MEMS-OMS assembly and pre-characterizations

S3. Air gap estimation

S4. Experimental setup

S5. Polarization Conversion for fixed incident LP state  $|y\rangle$  ( $\theta_{LP} = 90^\circ$ ) and DWP orientation  $\theta_{DWP} = 45^\circ$ .

S6. Higher quality of four typical polarization states (i.e.,  $|x\rangle$ ,  $|y\rangle$ ,  $|r\rangle$ ,  $|l\rangle$ ) with DWP orientation  $\theta_{DWP} = 46^\circ$ , for fixed incident LP state  $|y\rangle$  ( $\theta_{LP} = 90^\circ$ ).

S7. Versatile polarization transformations

References

#### Other Supplementary Material for this manuscript includes the following:

Supplementary Videos S1 to S6

## Supplementary Table 1

**Supplementary Table 1:** Overview of key performance characteristics estimated for some demonstrated devices with tunable birefringence.

| <i>Principle</i>                                                                          | <i>Stimulus</i> | <i>Birefringence range</i> | <i>Efficiency</i> | <i>Operation <math>\lambda</math>, Bandwidth</i> | <i>Response time</i> | <i>Ref.</i> |
|-------------------------------------------------------------------------------------------|-----------------|----------------------------|-------------------|--------------------------------------------------|----------------------|-------------|
| Plasmonic OMS and tunable FP cavity, in reflection                                        | Electrical      | $2\pi$                     | $\sim 75\%$       | 800 nm, BW $\sim 100$ nm                         | $< 400 \mu\text{s}$  | This work   |
| Plasmonic PB metasurface with liquid crystals, in reflection                              | Electrical      | $\pi$                      | $\sim 40\%$       | 633 nm, BW $\sim 110$ nm                         | 100 ms               | 1           |
| Tri-layer black phosphorus in a FP cavity, in reflection                                  | Electrical      | Half Poincaré sphere       | $< 10\%$          | 1440 nm, BW $< 10$ nm                            | —                    | 2           |
| Transient Nonlinear anisotropic effect in gold nanorods metamaterial, in transmission     | Optical         | $\pi$                      | $< 20\%$          | 700 nm, BW $\sim 10$ nm                          | 10 ps                | 3           |
| Transient symmetry breaking in gold metasurface, in transmission                          | Optical         | $< 1^\circ$                | $\sim 2\%^*$      | 650 nm, BW 100 nm                                | $< 1$ ps             | 4           |
| Transient anisotropic effect in ITO-integrated gold nanostructures, in transmission       | Optical         | $\pi / 7$                  | —                 | 1.23 $\mu\text{m}$ , BW $\sim 25$ nm             | 600 fs               | 5           |
| Chiral metasurface on vibrating silicon membrane with FP cavity underneath, in reflection | Electrical      | $\pi / 60$                 | $\sim 1\%^*$      | 1.45 $\mu\text{m}$ , BW $\sim 5$ nm              | 3 $\mu\text{s}$      | 6           |

\* The efficiency listed for Ref. 4 and 6 is derived from the normalized reflectance or transmittance change in one specific polarization channel, to indicate their polarization conversion capabilities.

## S1. Optimization of the nanobrick dimensions

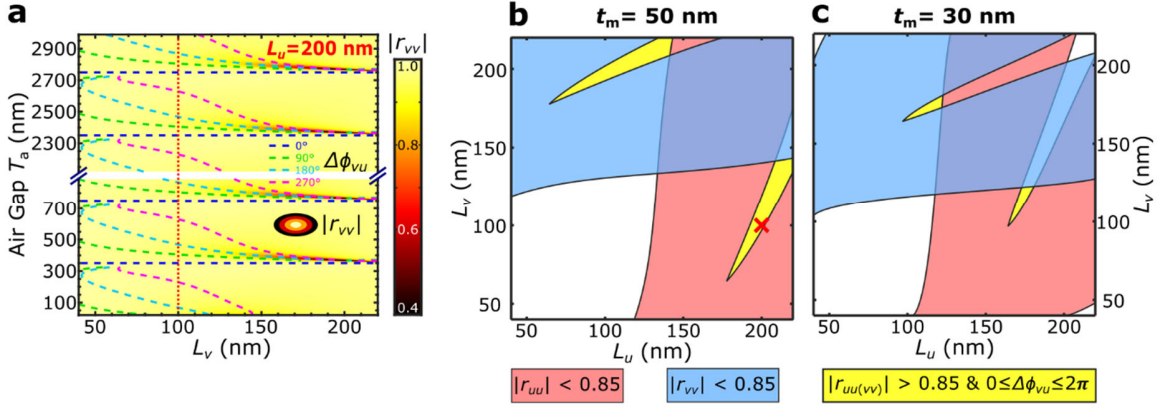

**Fig. S1. Choice of nanobrick dimensions.** **a** Reflection amplitude  $|r_{vv}|$  and birefringence ( $\Delta\phi_{vu}$ ) as a function of the nanobrick side length  $L_v$  and air gap  $T_a$  for the other side length  $L_u = 200$  nm. Color map is related to the reflection amplitude, while colored dashed lines represent constant birefringence contours, similarly to Fig. 1b. The vertical, dotted line corresponds to the selected nanobrick dimensions  $L_u \times L_v = 200$  nm  $\times$  100 nm. **b-c** Optimization of the nanobrick thickness. The  $L_u, L_v$  parameter space is divided into several regions, for nanobrick thicknesses of  $t_m = 50$  nm (**b**) and 30 nm (**c**). The red and blue areas indicate respectively where  $|r_{uu}| < 0.85$  and  $|r_{vv}| < 0.85$  for any value of  $T_a$ . The yellow areas indicate where the reflection amplitudes are large for all polarization states (i.e.,  $|r_{uu(vv)}| > 0.85$ ) and where additionally the birefringence  $\Delta\phi_{vu}$  can be adjusted fully between 0 and  $2\pi$  by varying the air gap  $T_a$ . Note that in these yellow areas, one polarization is almost entirely reflected by the OMS while the orthogonal polarization is partly transmitted, as can be seen from Fig. S2c. The red cross in (**b**) indicates the selected dimension  $L_u = 200$  nm and  $L_v = 100$  nm.

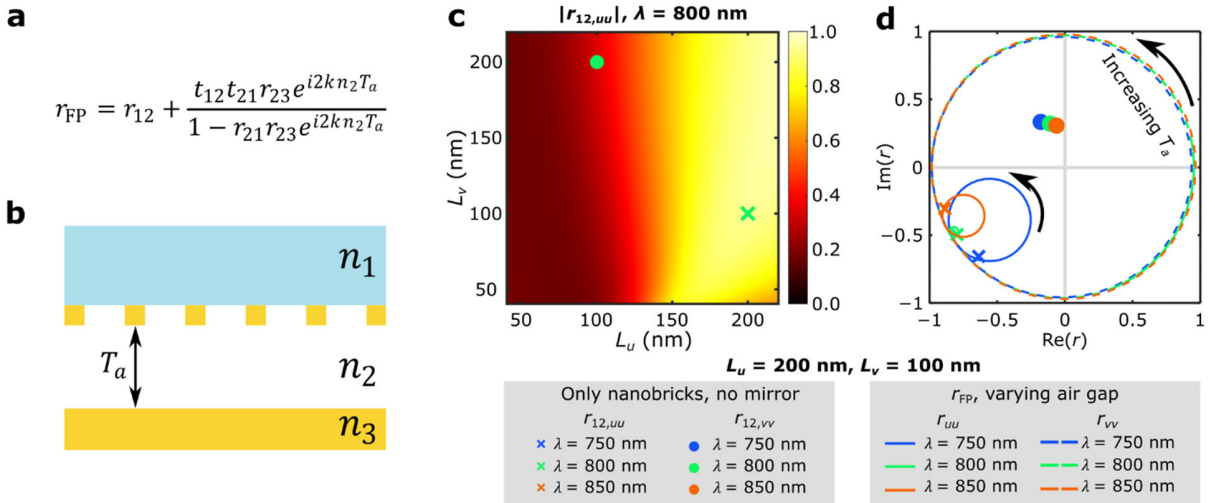

**Fig. S2. DWP operating in the FP regime and corresponding tunable reflection coefficients.** **a** FP equation of the total reflection coefficient for light normally incident on a multilayer structure consisting of

medium 1, OMS layer, media 2 and 3 as illustrated in (b). Here,  $r_{FP}$  is the complex reflection coefficient of the hybrid MEMS-OMS structure, and  $r_{mn}/t_{mn}$  represent the respective complex reflection/transmission coefficients for the interface between media  $m$  and  $n$  with light incident from medium  $m$ . The OMS layer is located between glass/air interface, and media 1, 2 and 3 are respective glass, air, and gold materials, thus the interface 12 represent a complex glass/OMS/air interface, and interface 23 is bare air/gold interface. **b** Side view of the schematic DWP consisting of a glass substrate (medium 1), an OMS layer (gold nanobrick array), an air gap  $T_a$  (medium 2), and MEMS mirror coated with thick gold film (medium 3). **c** Reflection amplitude  $|r_{12}|$  (related to the interface of medium 1/OMS/medium 2) for input linearly  $|u\rangle$  polarized light as a function of the nanobrick dimensions ( $L_u, L_v$ ) at  $\lambda = 800$  nm. **d** Total reflection coefficient  $r_{FP}$  in the complex plane with  $L_u = 200$  nm,  $L_v = 100$  nm,  $t_m = 50$  nm, and  $A = 250$  nm for three different wavelengths of  $\lambda = 750, 800$  and  $850$  nm. Filled crosses and circles in (c, d) show  $r_{12}$  for incident light linearly polarized along respective  $u$  and  $v$  directions (i.e., along either nanobrick sides), while solid and dashed lines represent the variation of  $r_{FP}$  as a function of the air gap  $T_a$ , for incident light linearly polarized along  $u$  and  $v$  directions, respectively. Arrows indicate the direction  $r_{FP}$  traverses along the trajectory as  $T_a$  increases.

## S2. MEMS-OMS assembly and pre-characterizations

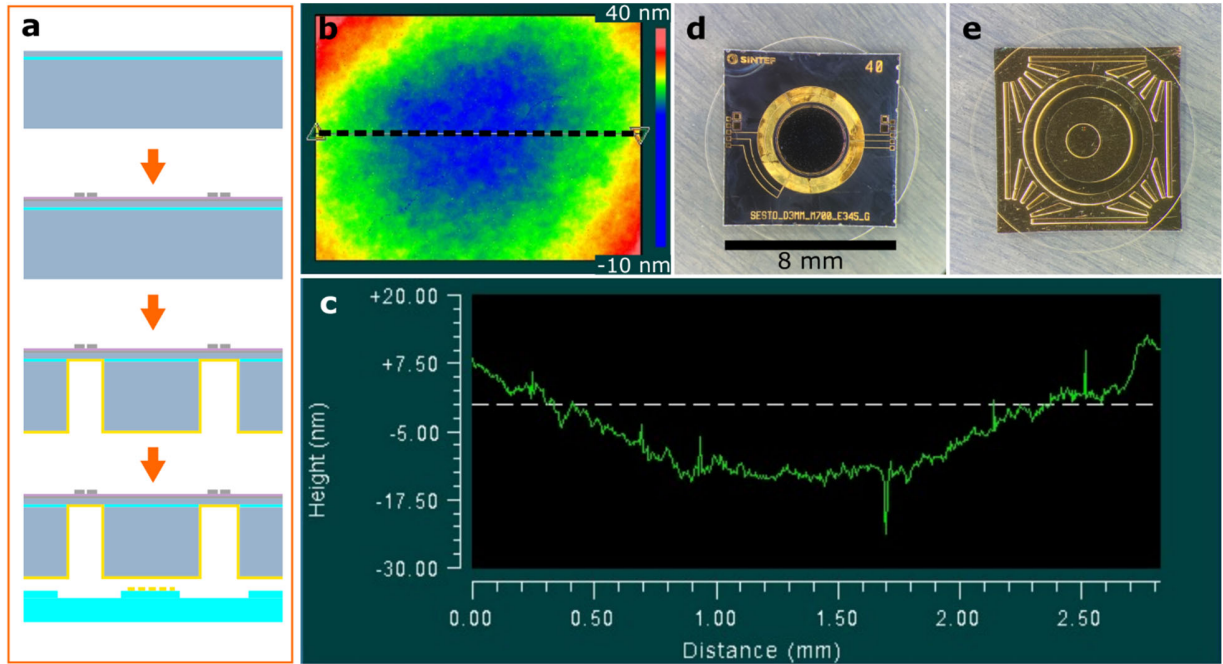

**Fig. S3. MEMS-OMS fabrication and MEMS mirror characterization.** **a** Simplified cross-section illustration of the MEMS-OMS fabrication process: preparation of a silicon-on-insulator wafer; a bottom electrode layer, PZT layer and top electrodes are deposited on the device layer; subsequently an annular trench is etched through the substrate and oxide layers, before the wafer is covered in a reflective gold coating – resulting in a central mirror suspended by an annular membrane; finally the wafer is diced into individual chips that are glued to glass substrates with an OMS. The glass substrates have a 10  $\mu\text{m}$  deep annular trench to reduce issues with big particle contaminants between the MEMS mirror and glass surface. **b-c** White light interferometric measurement (Zygo NewView 6300) of the MEMS mirror surface. **(c)** shows the profile along the dashed line in **(b)**. **d-e** Optical microscope images of the MEMS chip on the glass substrate.

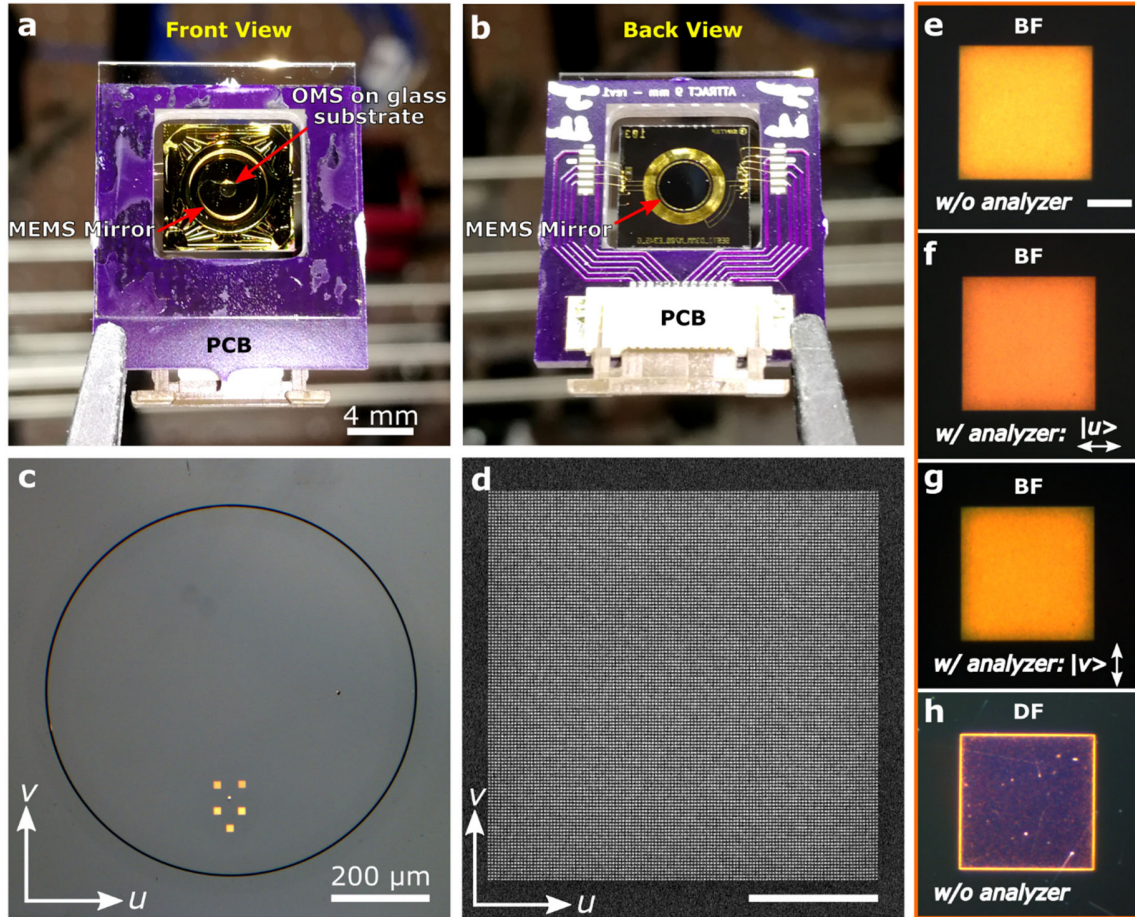

**Fig. S4. MEMS-OMS-based DWP assembly.** **a-b** Typical photos of the MEMS-OMS-based DWP assembly consisting of the OMS fabricated on a glass substrate, an ultra-flat piezoelectric MEMS mirror, and a printed circuit board (PCB) for electrical connection. **c-d** Optical microscopy (**c**) and SEM (**d**) images of the OMS representing the 30 μm by 30 μm and 250-nm-period array of same-sized gold nanobricks ( $L_u = 200$  nm,  $L_v = 100$  nm) designed for DWP, fabricated atop a 10-μm-high circular pedestal on the glass substrate, and used in the MEMS-OMS-based DWP assembly. Scalebar in (**d**) is 10 μm. **e-h** Bright and dark field optical reflection microscopy images of the OMS fabricated on the glass substrate before assembling to MEMS mirror, captured with (**f, g**) and without (**e, h**) polarization analyzer. Scale bar in (**e**) is 10 μm, which also applies to (**f-h**).

### S3. Air gap estimation

For larger air gaps (i.e.,  $T_a > 100$  nm for 800-nm wavelength), the underlying physics dominate the optical response of the MEMS-OMS-based DWP slip into a FP regime in which the MEMS-OMS structure can be considered as a hybrid FP cavity consisted of multilayers including a thick gold layer, an air gap layer (with thickness  $T_a$ ), an OMS layer, and a glass layer (Fig. S2b), thus the optical response of the MEMS-OMS structure is governed by the FP equation<sup>7-9</sup>, as shown in Fig. S2a:

$$r_{\text{FP}} = r_{12} + \frac{t_{12}t_{21}r_{23}e^{i2kn_2T_a}}{1-r_{21}r_{23}e^{i2kn_2T_a}} \quad (1)$$

If we consider the OMS layer as a periodic structured infinitesimally layer, we have the following relationship<sup>9-11</sup>:  $t_{12} = 1 + r_{12}$  and  $t_{21} = 1 + r_{21}$ , then equation (1) could be simplified as:

$$r_{\text{FP}} = r_{12} + \frac{(1 + r_{12})(1 + r_{21})r_{23}e^{i2kn_2T_a}}{1 - r_{21}r_{23}e^{i2kn_2T_a}} = \frac{r_{12} + (1 + r_{12} + r_{21})r_{23}e^{i2kn_2T_a}}{1 - r_{21}r_{23}e^{i2kn_2T_a}}$$

Assume  $|r_{23}| = 1$ , we could then always get  $r_{23}e^{i2kn_2T_a} = -1$ , for a series of periodic-distributed air gaps. At these air gaps, the total reflection coefficient from the MEMS-OMS structure is:

$$r_{\text{FP}} = \frac{r_{12} + (1 + r_{12} + r_{21}) \times (-1)}{1 - r_{21} \times (-1)} = \frac{-(1 + r_{21})}{(1 + r_{21})} = -1$$

Finally, we get  $r_{\text{FP}} = -1$ , which implies, for a series of periodic-distributed air gaps, the MEMS-OMS structure operates as a featureless perfect mirror, regardless of the dimensions and arrangement of the OMS structures, as if the OMS layer is not present! Note that the prerequisite for arriving at a perfect mirror operation is  $|r_{23}| = 1$ , which is approximately true for the air/gold interface implemented in the current MEMS-OMS-based DWP design (Fig. S5). The reflection amplitude for the air/gold(ideal) interface is close to 1.0 (i.e.,  $>0.98$ ) within the investigated wavelength range of 650-1000 nm. One would also notice that even if the practical gold materials may have larger losses, the influences are still negligible (Fig. S5).

The mirror-like operation described above have almost no correlation with the nanobrick dimensions in the OMS layer and the practical gold material losses, however it is strongly influenced by the wavelength (Fig. S6) which could be clearly observed by the condition  $r_{23}e^{i2kn_2T_a} = -1$  in which  $\mathbf{k}$  is the wavevector in vacuum and solely determined by the wavelength  $\lambda$ . From equation (1), we could also conclude that the response of the MEMS-OMS structures is periodic with respect to the air gap  $T_a$ .

The relationship between the air gap  $T_a$  and wavelength  $\lambda$  connected to the mirror-like operation provides a reliable approach for in situ estimating the practical air gap sizes in each measurement. For example, in experiment, if we incident a broadband light with LP  $|y\rangle$  state onto the MEMS-OMS DWP, regardless of the DWP orientation, we could always expect some reflection minimum by detecting the reflected light with a polarization analyzer along  $|x\rangle$  direction (i.e., orthogonal to input LP  $|y\rangle$  state) at specific wavelengths. This information builds up a one-to-one mapping between the practical air gaps and the actuation voltages applied to the MEMS mirror in each measurement (Fig. S7).

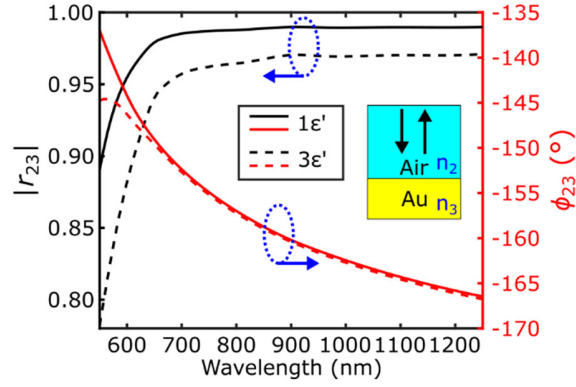

**Fig. S5. Calculated reflection coefficients of the air/gold interface.** Reflection amplitudes (black) and phases (red) as a function of the wavelength. Solid and dashed lines represent calculations with gold materials ideal ( $1\epsilon'$ ) and damping rate increased ( $3\epsilon'$ , the imaginary part of the ideal gold permittivity is increased by a factor of three), respectively.

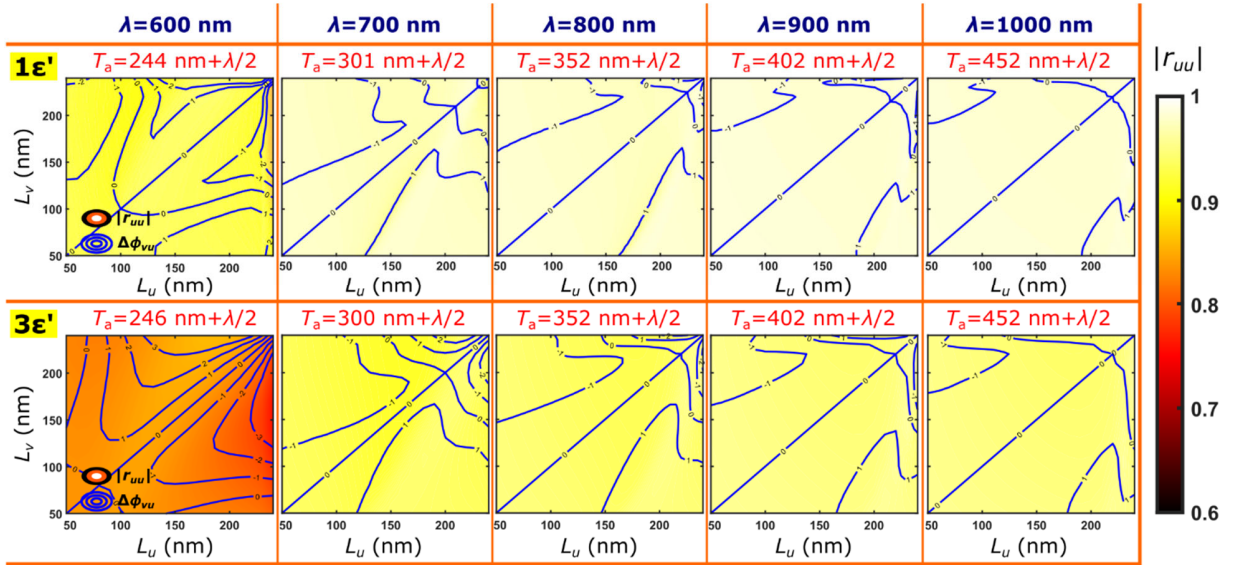

**Fig. S6. Mirror-like operation of the MEMS-OMS structures at specific air gaps for different wavelengths.** Calculated reflection amplitude  $|r_{uu}|$  (color map) and birefringence  $\Delta\phi_{vu}$  (blue contour lines) as a function of nanobrick dimensions ( $L_u$ ,  $L_v$ ) for  $\lambda = 250$  nm and  $t_m = 50$  nm. The top and bottom panels represent simulations with gold material ideal ( $1\epsilon'$ ) and damping rate increased ( $3\epsilon'$ , the imaginary part of the ideal gold permittivity is increased by a factor of three), respectively.

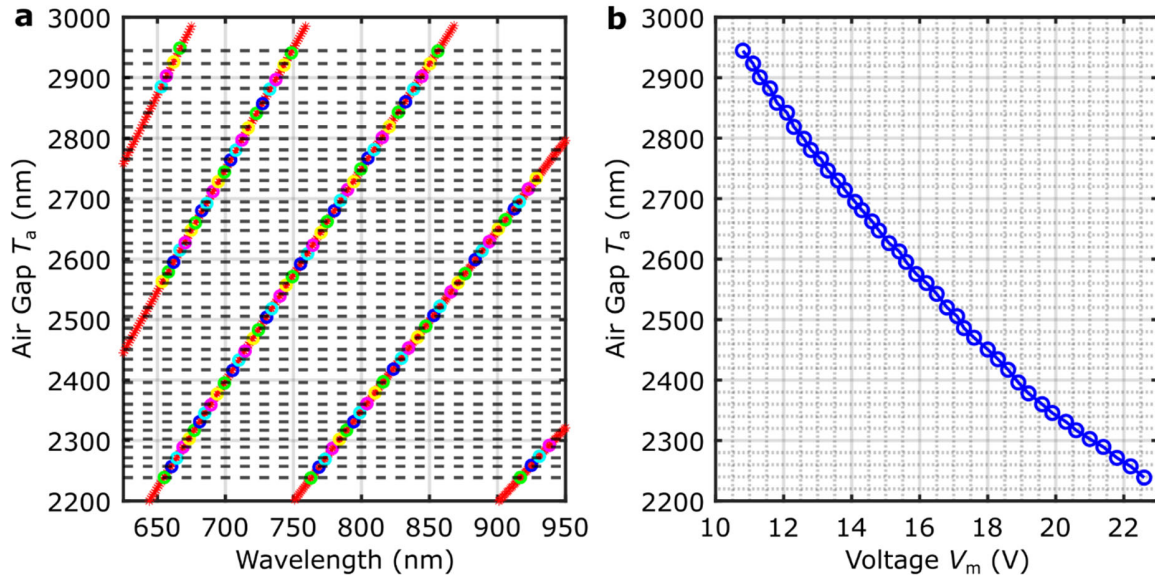

**Fig. S7. Air gap estimation.** **a** Estimating practical air gaps at different actuation voltages according to the mirror-like operations in the MEMS-OMS DWP. The red lines represent theoretical relationship between the air gap  $T_a$  and the wavelength for mirror operation, while the colored circles are extracted wavelengths exhibiting mirror-like operation obtained from each measurement (i.e., for different actuation voltages  $V_m$ ). The dashed horizontal lines are the least square fit between the experimental and theoretical data for estimating the air gap sizes. **b** Estimated air gap size  $T_a$  as a function of the actuation voltage  $V_m$ .



## S4. Experimental setup

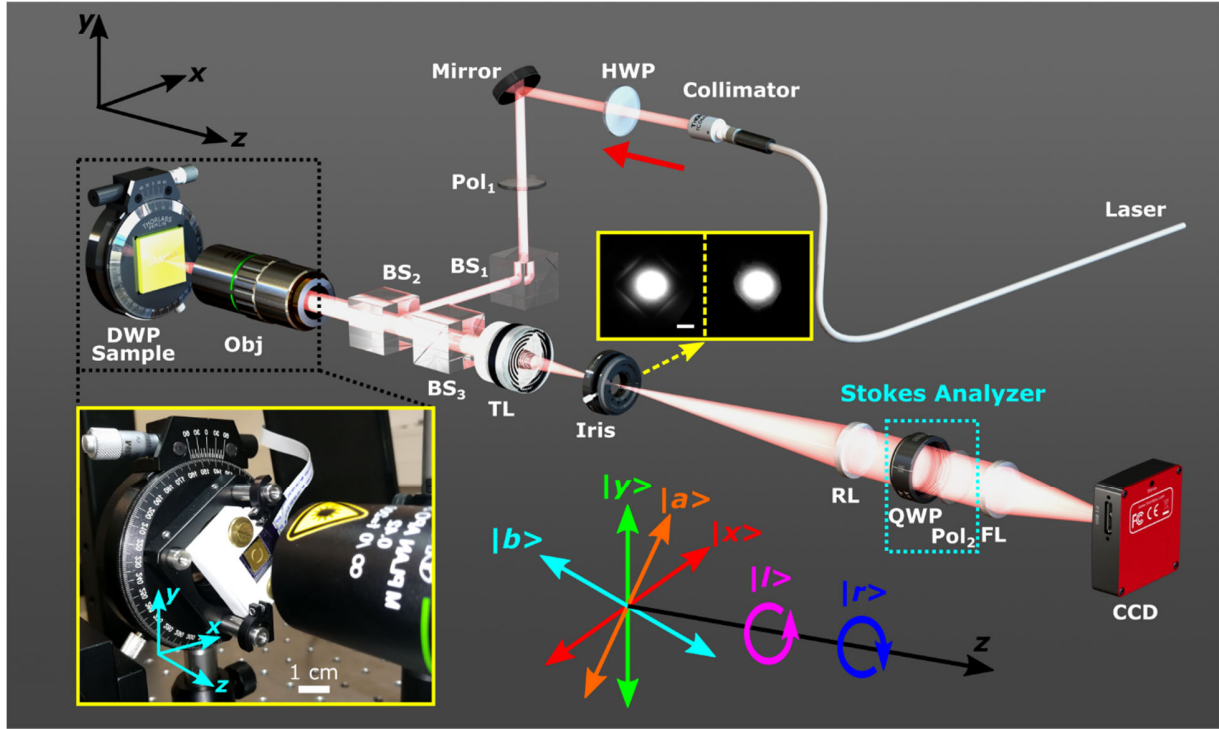

**Fig. S8. Experimental setup for characterizing MEMS-OMS DWP.** Laser: Fiber coupled laser sources; Collimator: fiber collimator (TC06APC-780, Thorlabs); HWP: Half-wave plate (AHWP10M-980, Thorlabs); Mirror: Protected silver mirror (PF10-03-P01, Thorlabs); Pol<sub>1,2</sub>: Linear Polarizer (LPNIR050-MP2, Thorlabs); BS<sub>1,2,3</sub>: Beam splitter (CCM1-BS014/M); Obj: Objective (M Plan Apo 20×/0.42, Mitutoyo); TL: Tube lens (TTL200-S8, Thorlabs); Iris: Spatial filter (SM1D12SZ, Thorlabs); RL: Relay lens (AC254-200-B-ML,  $f=200$  mm, Thorlabs); QWP: Quarter-wave plate (AQWP10M-980, Thorlabs); FL: Flip lens (AC254-100-B-ML,  $f=100$  mm, Thorlabs); CCD: CCD camera (DCC1545M, Thorlabs). The iris is located at the first conjugated image plane for filtering out the area of interest in the measurement, and the Stokes analyzer consisting of a QWP and a Pol<sub>2</sub> is implemented for full Stokes polarimetry. The lower-left inset is a typical optical image of the DWP sample mounted on a high precision rotation stage (PRM1, Thorlabs). The lower-right inset is the definition of the polarization bases used in the polarization characterization, i.e.,  $(|x\rangle, |y\rangle)$ ,  $(|a\rangle, |b\rangle)$ , and  $(|r\rangle, |l\rangle)$ .

**S5. Polarization Conversion for fixed incident LP state  $|y\rangle$  ( $\theta_{LP} = 90^\circ$ ) and DWP orientation  $\theta_{DWP} = 45^\circ$ .**

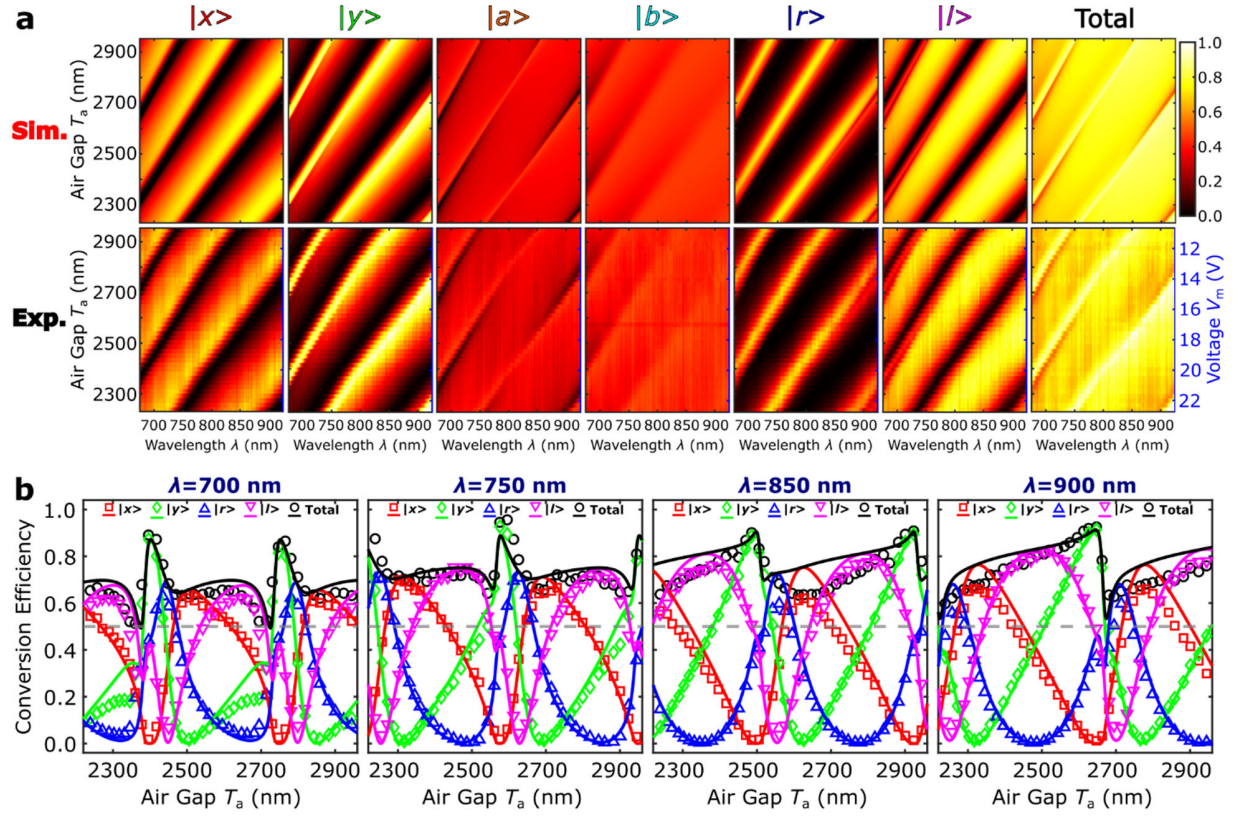

**Fig. S9. Polarization conversion efficiencies for fixed input LP  $|y\rangle$  state ( $\theta_{LP} = 90^\circ$ ) and DWP orientation  $\theta_{DWP} = 45^\circ$ .** **a** Calculated (above) and measured (below) polarization conversion efficiencies as a function of the air gap  $T_a$  (or actuation voltage  $V_m$ ) and light wavelength  $\lambda$ . **b** Calculated (lines) and measured (markers) polarization conversion efficiencies as a function of  $T_a$  for the light wavelength  $\lambda = 700, 750, 850, \text{ and } 900$  nm, respectively.

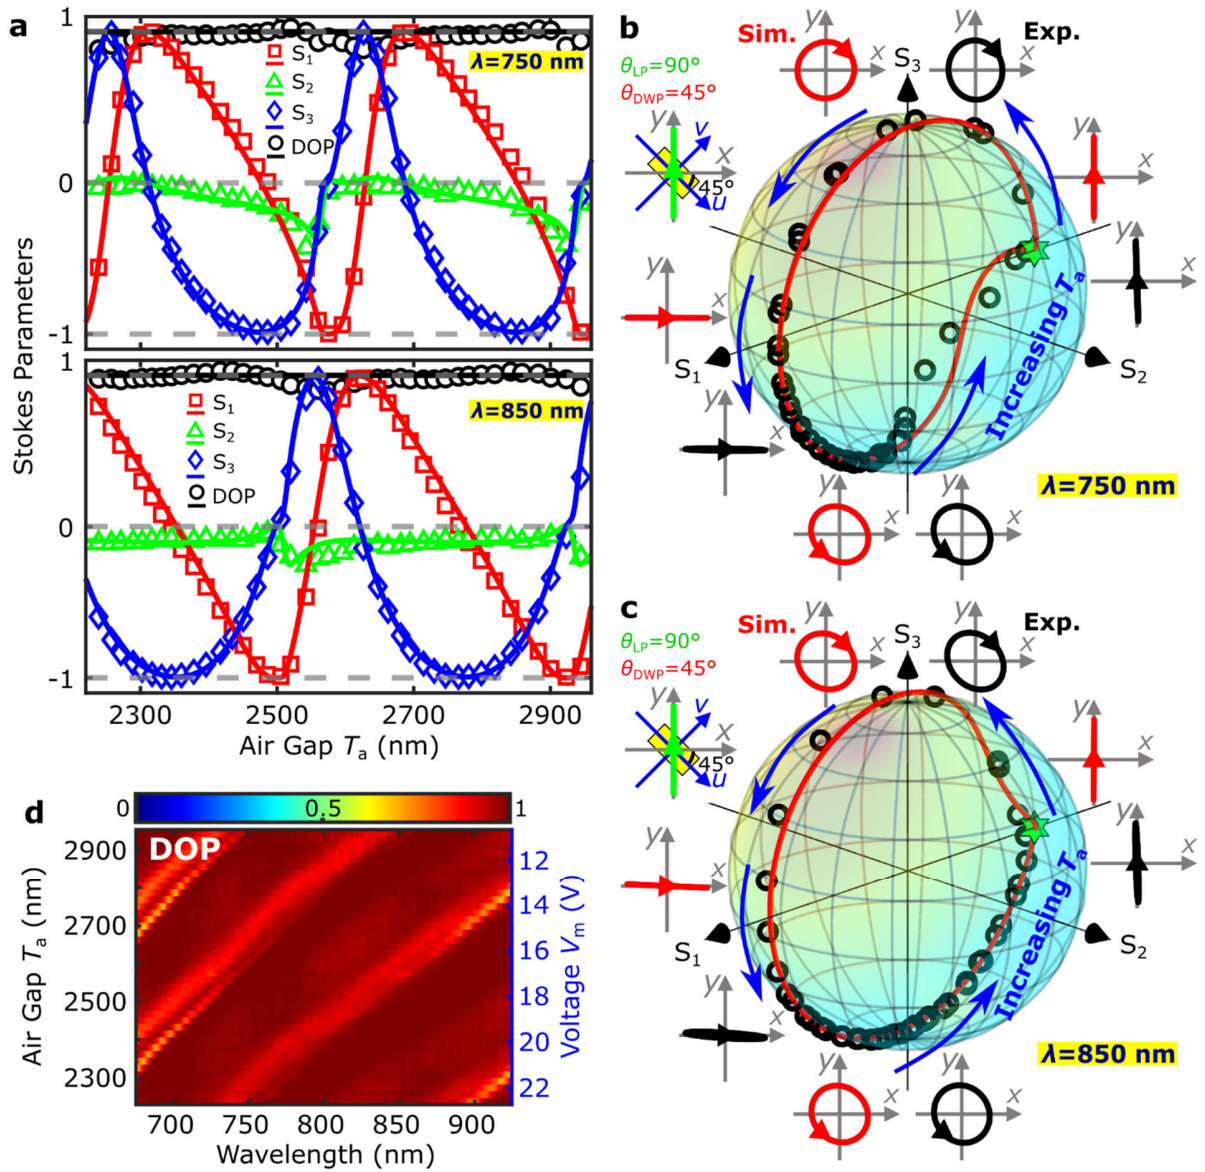

**Fig. S10. Polarization transformations for fixed input LP  $|y\rangle$  state ( $\theta_{LP} = 90^\circ$ ) and DWP orientation  $\theta_{DWP} = 45^\circ$ .** **a** Calculated (lines) and measured (markers) normalized Stokes parameters ( $S_1$ ,  $S_2$ ,  $S_3$ ) as a function of air gap  $T_a$  for light wavelength  $\lambda = 750$  and  $850$  nm, respectively. **b-c** Calculated (lines) and measured (circles) polarization trajectories on the Poincaré spheres mapping the reflected light polarization evolution shown in (a) for two different light wavelengths of  $\lambda = 750$  (b) and  $850$  (c) nm, respectively. As the air gap  $T_a$  increases, the reflected polarization state revolves repeatedly around the sphere. The green stars mark the input LP state:  $|y\rangle$ . The calculated (red) and measured (black) polarization ellipses illustrate the polarization contrast between the main orthogonal polarization states ( $|x\rangle$  and  $|y\rangle$ ,  $|r\rangle$  and  $|l\rangle$ ) realized by tuning the air gap  $T_a$ . **d** Measured DOP of the reflected light as a function of the air gap  $T_a$  (or actuation voltage  $V_m$ ) and light wavelength  $\lambda$ .

**S6. Higher quality of four typical polarization states (i.e.,  $|x\rangle$ ,  $|y\rangle$ ,  $|r\rangle$ ,  $|l\rangle$ ) with DWP orientation  $\theta_{\text{DWP}}=46^\circ$ , for fixed incident LP state  $|y\rangle$  ( $\theta_{\text{LP}}=90^\circ$ ).**

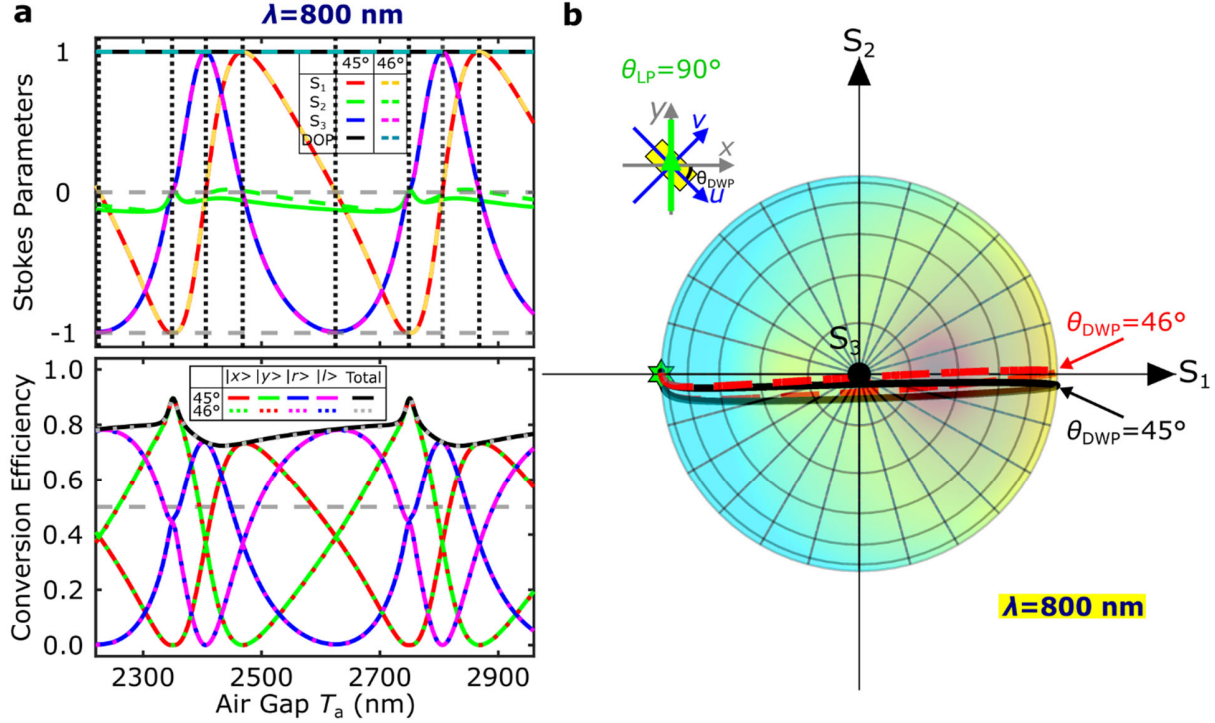

**Fig. S11. Polarization transformations for linearly  $|y\rangle$  polarized light incidence and DWP oriented at respective  $\theta_{\text{DWP}}=45^\circ$  and  $46^\circ$ .** **a** Calculated normalized Stokes parameters (above) and polarization conversion parameters (below) as a function of the air gap  $T_a$  for the light wavelength  $\lambda = 800 \text{ nm}$ , with  $\theta_{\text{DWP}}=45^\circ$  and  $46^\circ$ , respectively. **b** Top view of the calculated polarization trajectories on the Poincaré sphere mapping the reflected light polarization evolution shown in (a). The green star marks the incident LP state:  $|y\rangle$ . The solid and dashed lines are corresponding to DWP oriented at  $\theta_{\text{DWP}}=45^\circ$  and  $46^\circ$ , respectively.

**Supplementary Table 2.** Calculated polarization purity and polarization conversion efficiency of the four typical polarization states (i.e.,  $|x\rangle$ ,  $|y\rangle$ ,  $|r\rangle$ ,  $|l\rangle$ ), with DWP oriented at respective  $\theta_{\text{DWP}} = 45^\circ$  and  $46^\circ$ , for linearly  $|y\rangle$  polarized light incidence.

| $\theta_{\text{DWP}}$ | $45^\circ$     |         |                |            | $46^\circ$     |         |                |            |
|-----------------------|----------------|---------|----------------|------------|----------------|---------|----------------|------------|
|                       | $S_1$          | $S_2$   | $S_3$          | Efficiency | $S_1$          | $S_2$   | $S_3$          | Efficiency |
| $ x\rangle$           | <b>0.9983</b>  | -0.0577 | 0.0049         | 0.7325     | <b>0.9999</b>  | 0.0120  | 0.0049         | 0.7316     |
| $ y\rangle$           | <b>-1.0000</b> | 0.0072  | 0.0004         | 0.8929     | <b>-1.0000</b> | 0.0072  | 0.0004         | 0.8931     |
| $ r\rangle$           | 0.0097         | -0.0507 | <b>0.9987</b>  | 0.7372     | 0.0103         | -0.0155 | <b>0.9998</b>  | 0.7363     |
| $ l\rangle$           | 0.0060         | -0.1249 | <b>-0.9921</b> | 0.7809     | 0.0091         | -0.0901 | <b>-0.9959</b> | 0.7790     |

## S7. Versatile polarization transformations

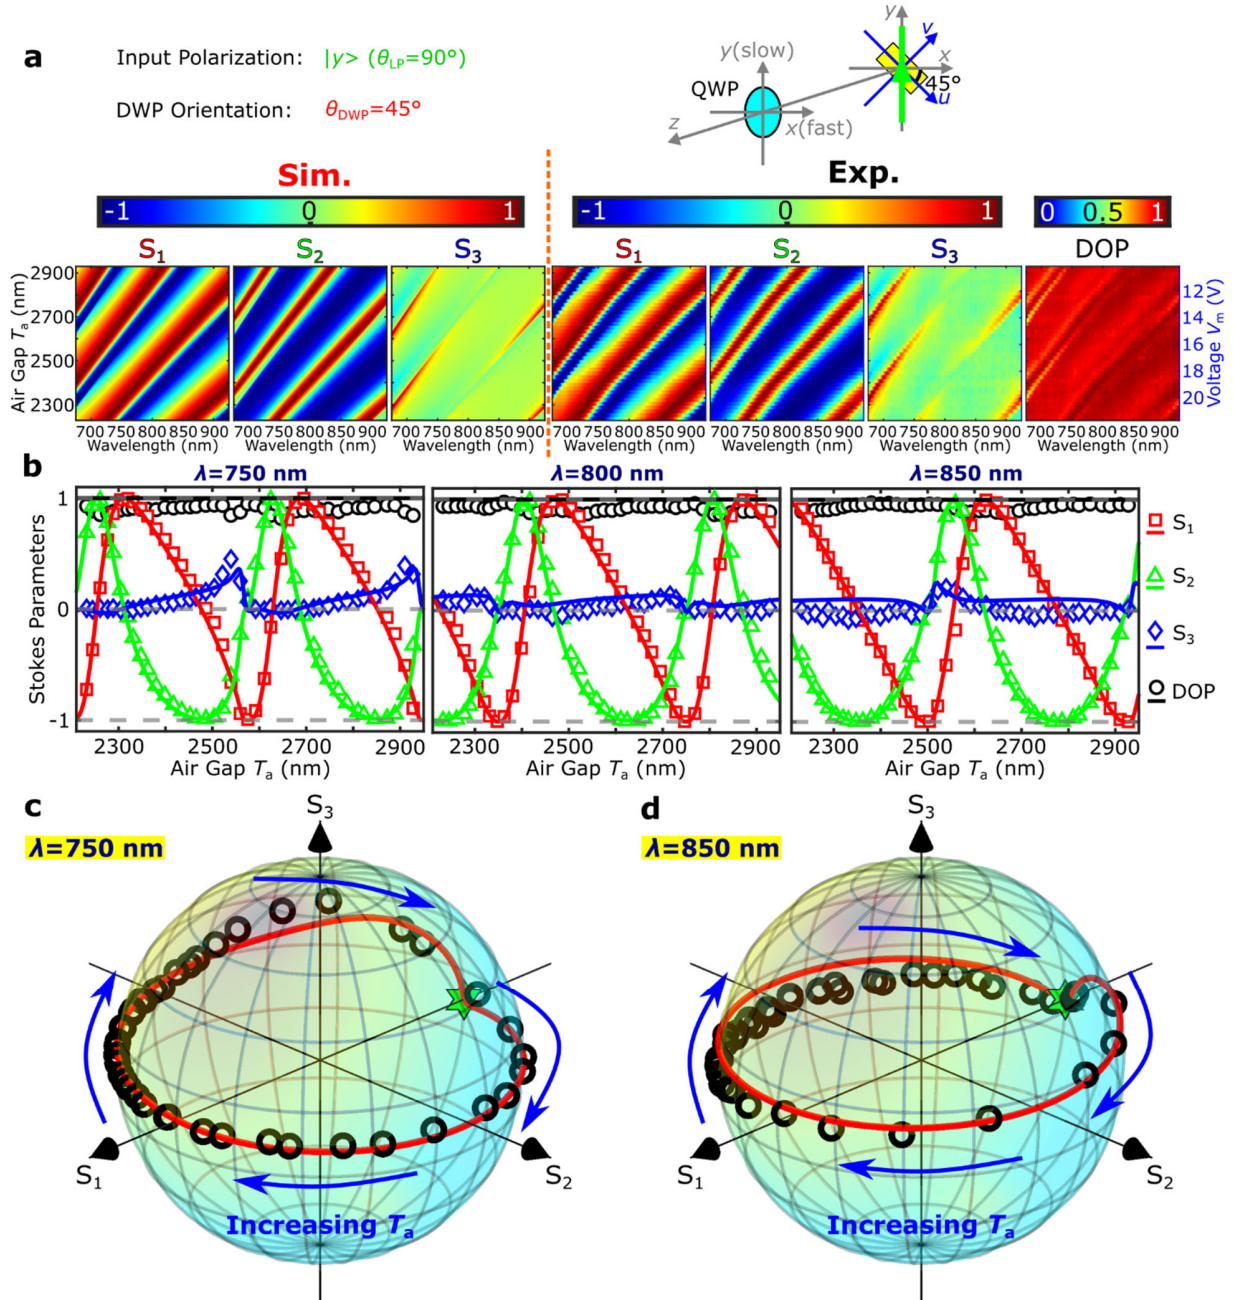

**Fig. S12. Continuous linear polarization rotation.** **a** Calculated (left) and measured (right) normalized Stokes parameters ( $S_1$ ,  $S_2$ ,  $S_3$ ) and DOP as a function of the air gap  $T_a$  (or actuation voltage  $V_m$ ) and light wavelength  $\lambda$ . The upper-right inset illustrate the QWP-DWP component: a QWP with fixed QWP orientation (fast axis along  $x$  direction) is placed in front of the DWP ( $\theta_{DWP} = 45^\circ$ ), excited by an incident LP state  $|y\rangle$ . **b** Calculated (lines) and measured (markers) normalized Stokes parameters as a function of  $T_a$  for light wavelengths  $\lambda = 750, 800$  and  $850$  nm, respectively. **c-d** Calculated (lines) and measured (circles) polarization trajectories on the Poincaré sphere realized by tuning the air gap  $T_a$  for light wavelength  $\lambda = 750$  (c) and  $850$  (d) nm, respectively.

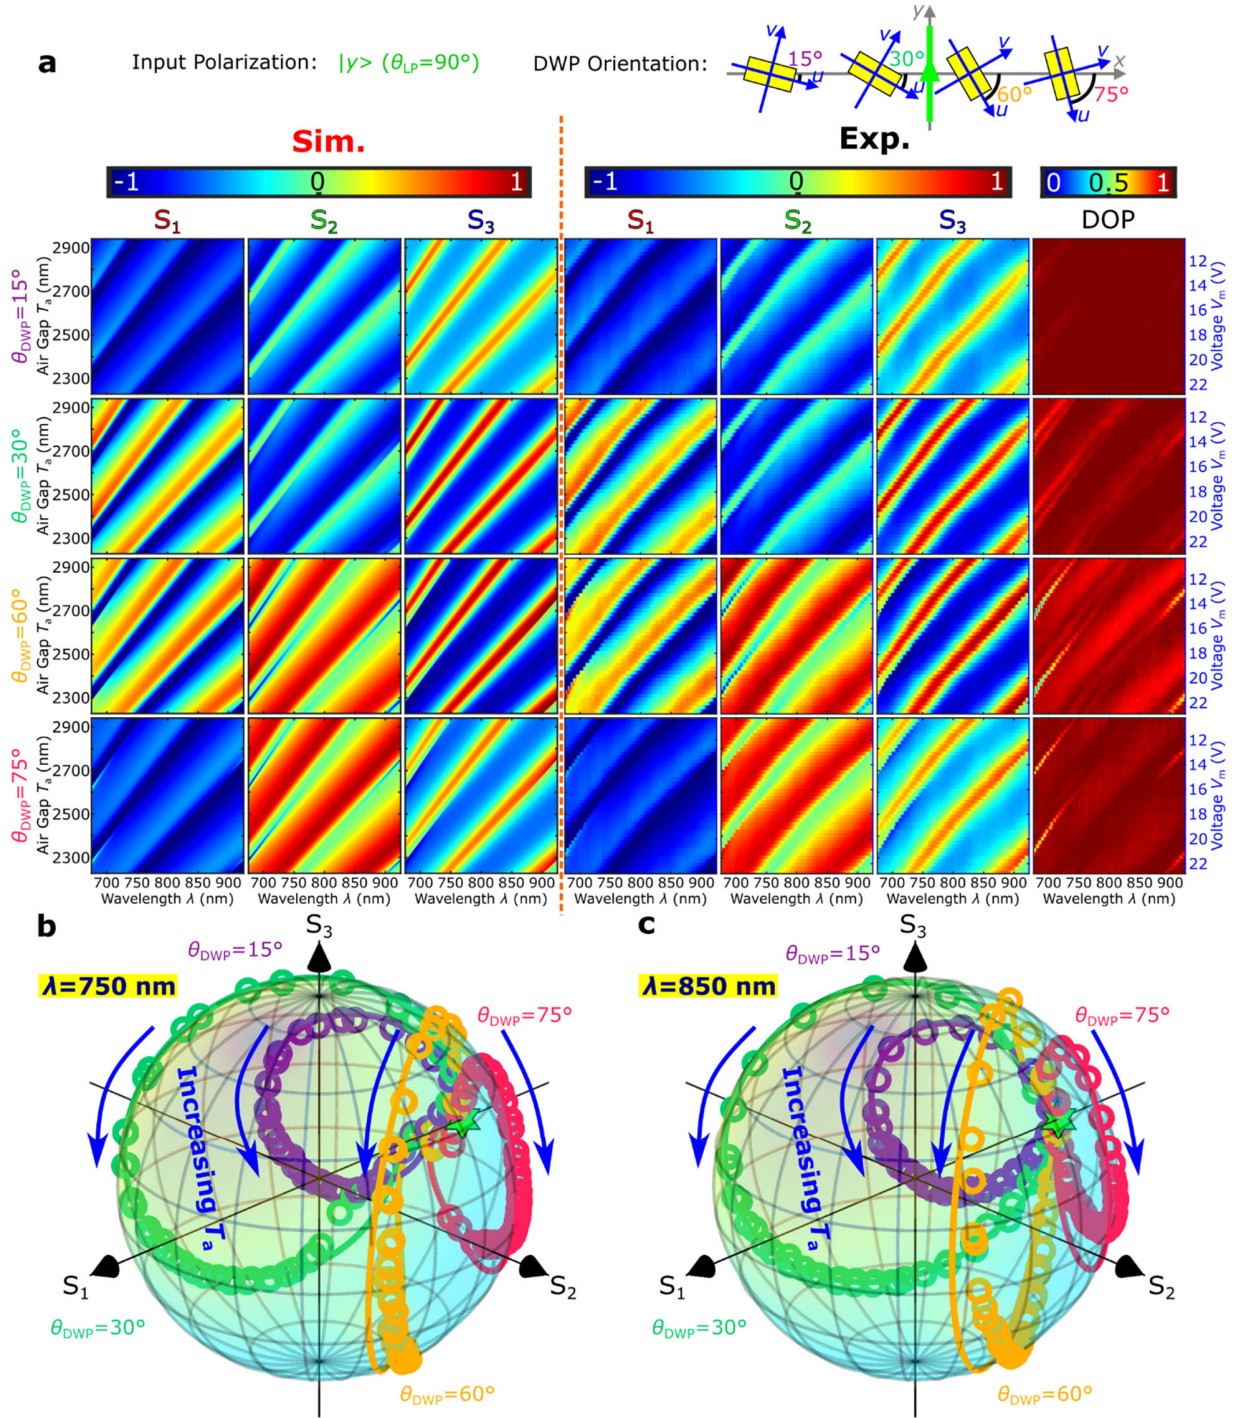

**Fig. S13. Versatile polarization transformations for fixed input LP  $|y\rangle$  state ( $\theta_{LP} = 90^\circ$ ) and different DWP orientations.** **a** Calculated (left) and measured (right) normalized Stokes parameters ( $S_1$ ,  $S_2$ ,  $S_3$ ) and DOP as a function of the air gap  $T_a$  (or actuation voltage  $V_m$ ) and light wavelength  $\lambda$ , for four different DWP orientations of  $\theta_{DWP} = 15^\circ$ ,  $30^\circ$ ,  $60^\circ$  and  $75^\circ$ , respectively. **b-c** Calculated (lines) and measured (circles) polarization trajectories on the Poincaré sphere realized by tuning the air gap  $T_a$ , with four different DWP orientations  $\theta_{DWP} = 15^\circ$  (purple),  $30^\circ$  (green),  $60^\circ$  (yellow) and  $75^\circ$  (red), for  $\lambda = 750$  (**b**) and  $850$  (**c**) nm, respectively.

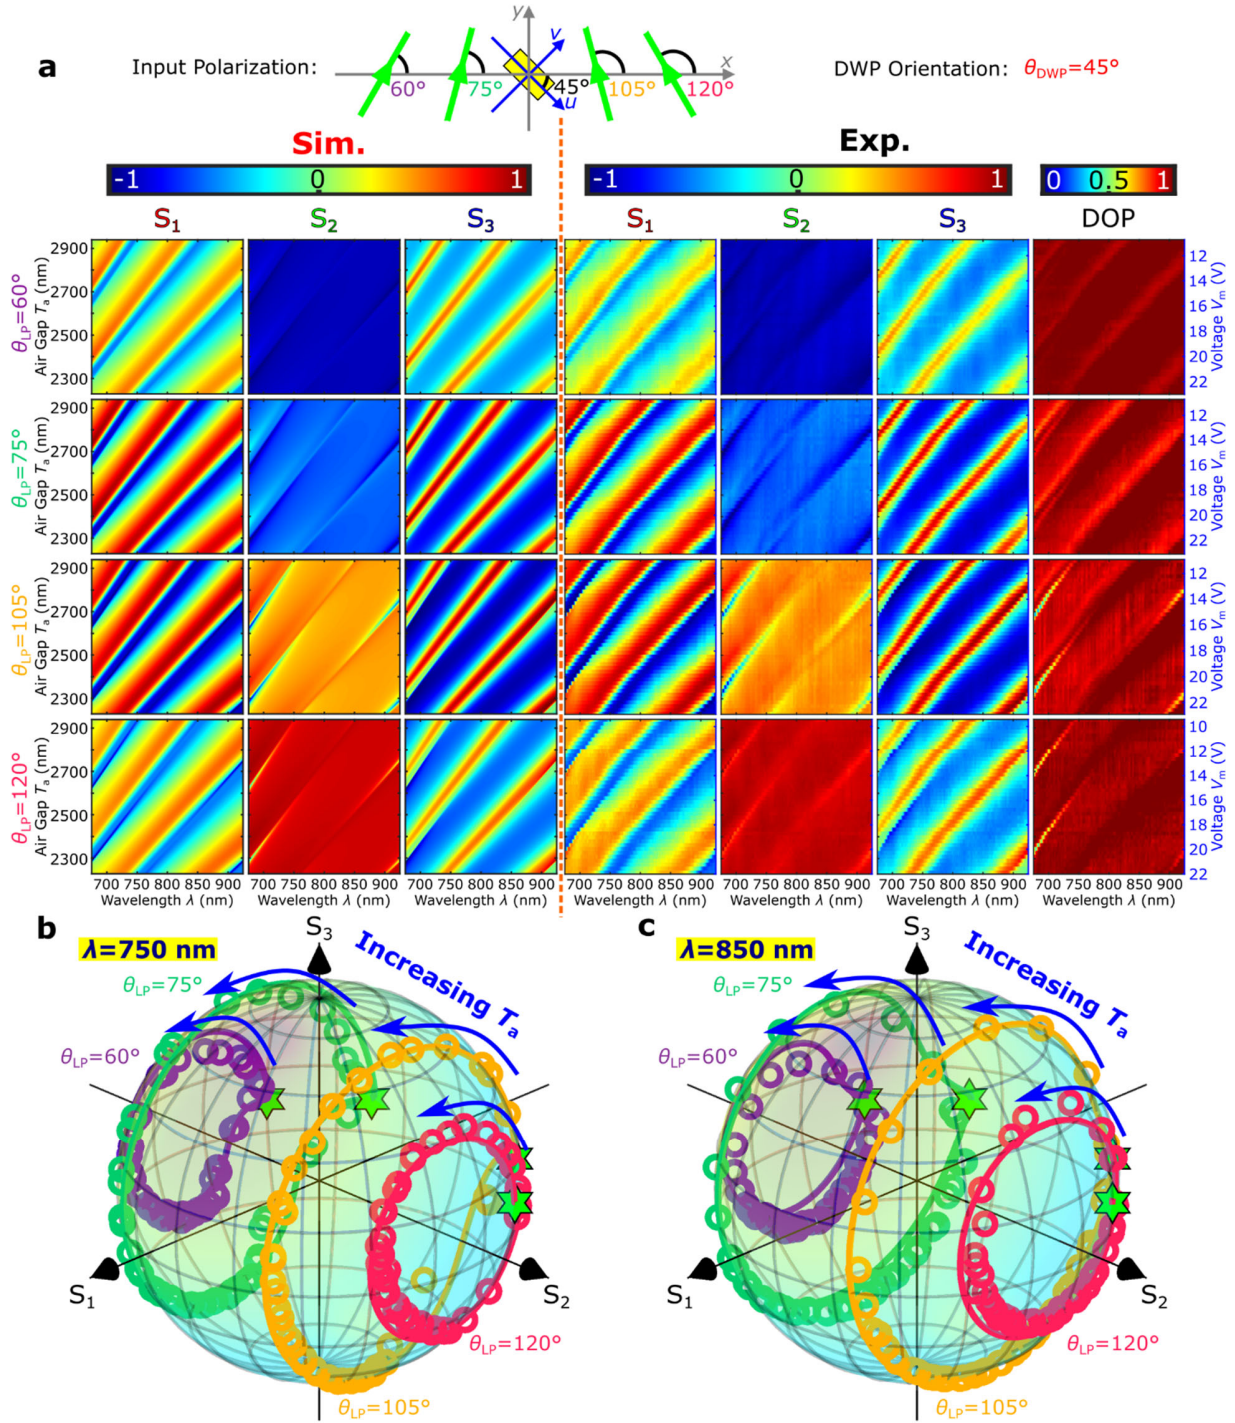

**Fig. S14. Versatile polarization transformations for fixed DWP orientation ( $\theta_{DWP} = 45^\circ$ ) and different input LP states.** **a** Calculated (left) and measured (right) normalized Stokes parameters ( $S_1$ ,  $S_2$ ,  $S_3$ ) and DOP as a function of the air gap  $T_a$  (or actuation voltage  $V_m$ ) and light wavelength  $\lambda$ , for four different input LP states of  $\theta_{LP} = 60^\circ$ ,  $75^\circ$ ,  $105^\circ$  and  $120^\circ$ , respectively. **b-c** Calculated (lines) and measured (circles) polarization trajectories on the Poincaré sphere realized by tuning the air gap  $T_a$ , with four different input LP states  $\theta_{LP} = 60^\circ$  (purple),  $75^\circ$  (green),  $105^\circ$  (yellow),  $120^\circ$  (red), for  $\lambda = 750$  (**b**) and  $850$  (**c**) nm, respectively.

## References:

1. Yu, P., Li, J. & Liu, N. Electrically tunable optical metasurfaces for dynamic polarization conversion. *Nano Lett.* **21**, 6690–6695 (2021).
2. Biswas, S., Grajower, M. Y., Watanabe, K., Taniguchi, T. & Atwater, H. A. Broadband electro-optic polarization conversion with atomically thin black phosphorus. *Science* **374**, 448–453 (2021).
3. Nicholls, L. H. *et al.* Ultrafast synthesis and switching of light polarization in nonlinear anisotropic metamaterials. *Nat. Photon.* **11**, 628–633 (2017).
4. Schirato, A. *et al.* Transient optical symmetry breaking for ultrafast broadband dichroism in plasmonic metasurfaces. *Nat. Photon.* **14**, 723–727 (2020).
5. Wang, K. *et al.* High contrast, femtosecond light polarization manipulation in epsilon-near-zero material coupled to a plasmonic nanoantenna array. *ACS Photonics* **8**, 2791–2799 (2021).
6. Zanotto, S. *et al.* Optomechanics of chiral dielectric metasurfaces. *Adv. Opt. Mater.* **8**, 1901507 (2020).
7. Chen, H.-T. Interference theory of metamaterial perfect absorbers. *Opt. Express* **20**, 7165 (2012).
8. Ameling, R. & Giessen, H. Microcavity plasmonics: Strong coupling of photonic cavities and plasmons. *Laser Photon. Rev.* **7**, 141–169 (2013).
9. Berkhout, A. & Koenderink, A. F. Perfect absorption and phase singularities in plasmon antenna array etalons. *ACS Photonics* **6**, 2917–2925 (2019).
10. Thongrattanasiri, S., Koppens, F. H. L. & García De Abajo, F. J. Complete optical absorption in periodically patterned graphene. *Phys. Rev. Lett.* **108**, 047401 (2012).
11. Yao, Y. *et al.* Electrically tunable metasurface perfect absorbers for ultrathin mid-infrared optical modulators. *Nano Lett.* **14**, 6526–6532 (2014).
