# Supplementary material for: Full-range birefringence control with piezoelectric MEMS-based metasurfaces
Source: PubMed Central journal article supplement (PMC9018774; doi:10.1038/s41467-022-29798-0), 2022-04-19
Supplement: 41467_2022_29798_MOESM3_ESM.pdf [file 41467_2022_29798_MOESM3_ESM.pdf]

## Inventory of Supporting Information

### **Full-range birefringence control with piezoelectric MEMS-based metasurfaces**

Chao Meng,<sup>1†</sup> Paul C. V. Thrane,<sup>1,2†</sup> Fei Ding,<sup>1\*</sup> and Sergey I. Bozhevolnyi<sup>1\*</sup>

<sup>1</sup>*Centre for Nano Optics, University of Southern Denmark, Campusvej 55, Odense DK-5230, Denmark*

<sup>2</sup>*SINTEF Microsystems and Nanotechnology, Gaustadalleen 23C, 0737 Oslo, Norway*

<sup>†</sup>These authors contributed equally to this work

\*Corresponding author emails: feid@mci.sdu.dk (F.D.); seib@mci.sdu.dk (S.I.B.)

1. A supplementary information file;
2. Supplementary Video S1;
3. Supplementary Video S2;
4. Supplementary Video S3;
5. Supplementary Video S4;
6. Supplementary Video S5;
7. Supplementary Video S6;
